# Supplementary figures and images for: Particle size control of mono-dispersed super-microporous silica spheresElectronic supplementary information (ESI) available: Comparison of the nitrogen and argon adsorption isotherms of De5 and scanning electron micrographs of calcined samples synthesized with different concentrations of TMABr and TMOS: De1, De6 and De7. See http://www.rsc.org/suppdata/jm/b3/b304867p/
Source: Royal Society of Chemistry journal article supplement (doi:10.1039/b304867p), 2003-01-01

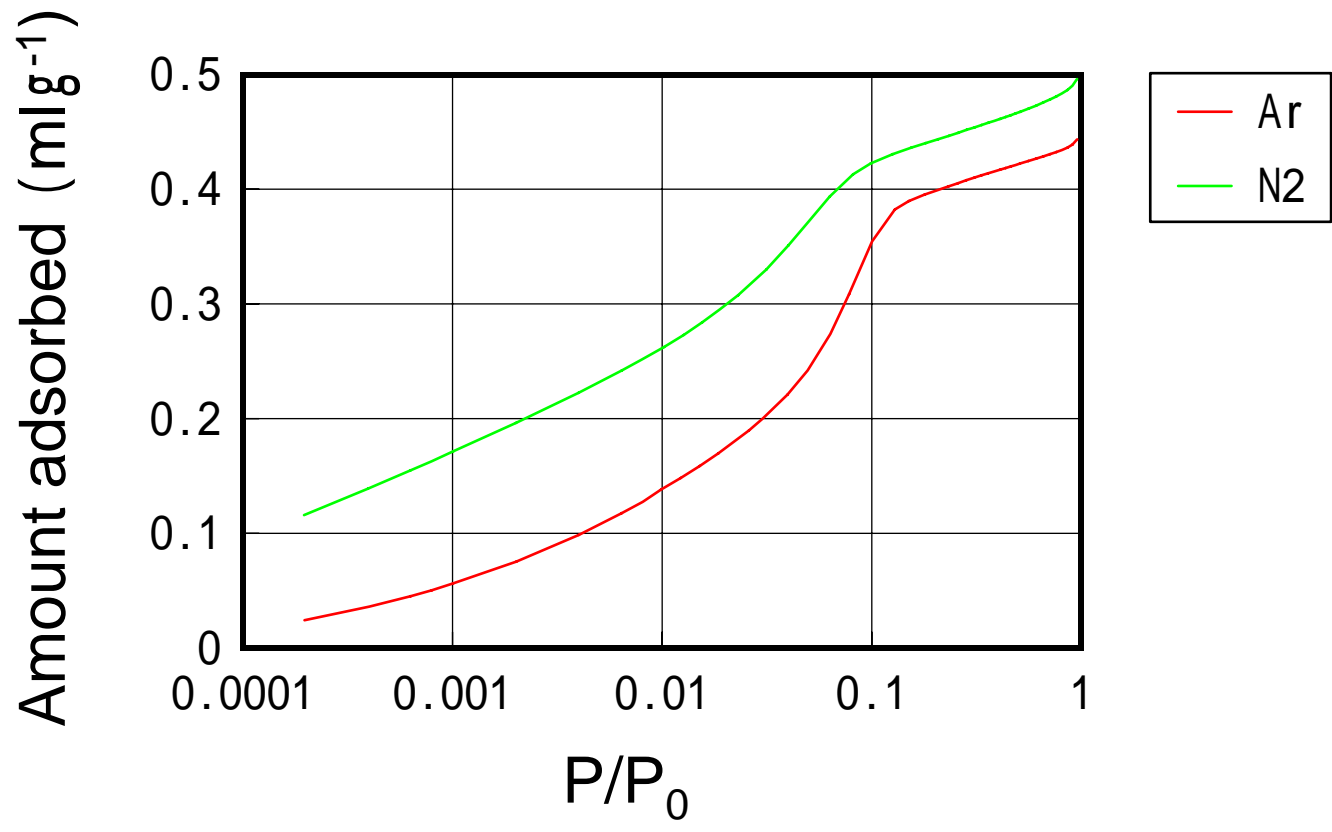

Supplement: b304867p1.pdf [file b304867p1.pdf]

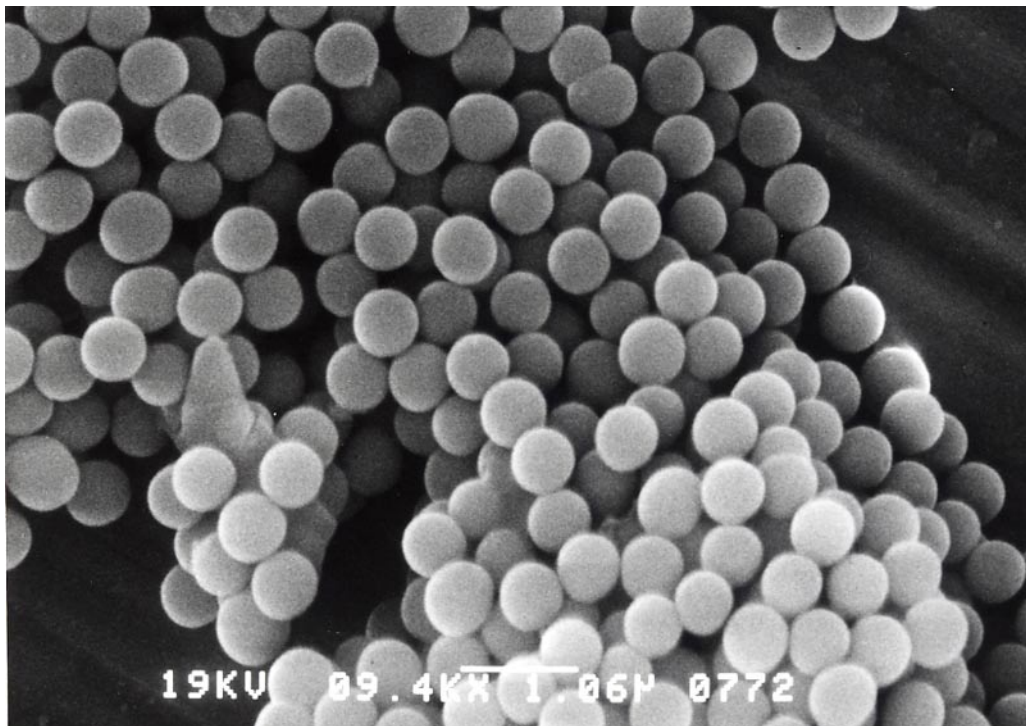

Supplement: b304867p2.pdf [file b304867p2.pdf]

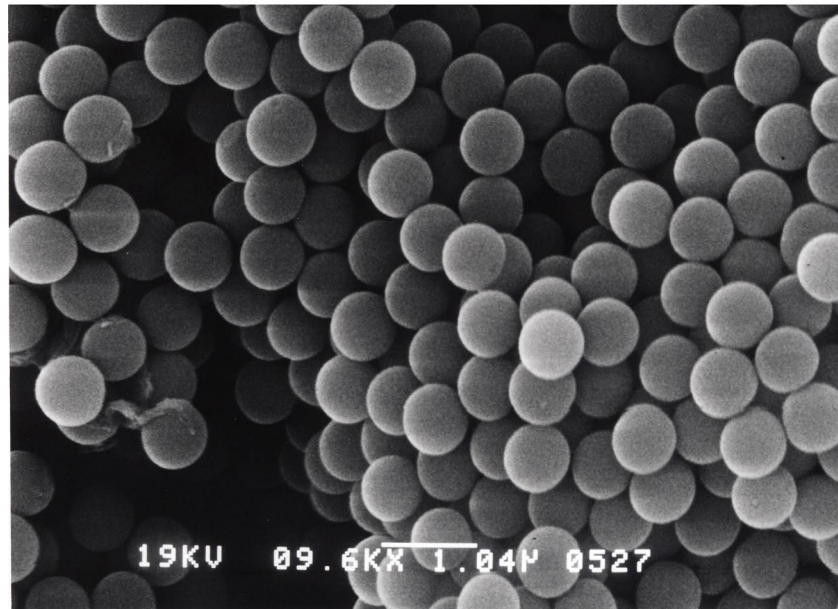

Supplement: b304867p4.pdf [file b304867p4.pdf]
